# Supplementary material
Source: publisher figshare collection journal article supplement (https://acs.figshare.com/ndownloader/files/25828444)
Supplement: Supplementary file 1 [file 25828444]

## Supporting Information

### Integration of TaO<sub>x</sub> with Bi<sub>2</sub>S<sub>3</sub> for Targeted Multimodality Breast Cancer Theranostics

Yushen Jin,<sup>1</sup> Chu Tang,<sup>2</sup> Jie Tian,<sup>3\*</sup> Bing Shao<sup>1\*</sup>

<sup>1</sup>Beijing Key Laboratory of Diagnostic and Traceability Technologies for Food Poisoning, Beijing Center for Disease Control and Prevention, Beijing 100013, China

<sup>2</sup>Engineering Research Center of Molecular and Neuro Imaging, Ministry of Education, School of Life Science and Technology, Xidian University, Xi'an, 710126, Shaanxi, China<sup>2</sup>

<sup>3</sup>Institute of Automation, Chinese Academy of Sciences, Beijing 100190, China

\*Corresponding author. Email: [tian@ieee.org](mailto:tian@ieee.org); [shaobingch@sina.com](mailto:shaobingch@sina.com)

The photothermal conversion efficiency ( $\eta$ ) is calculated with the following equation

$$\eta = \frac{hs(T_{\max} - T_{\text{surr}}) - Q_{\text{dis}}}{I(1 - 10^{-A_{\lambda}})}$$

where  $h$  is heat transfer coefficient,  $s$  is the surface area of container,  $(T_{\max} - T_{\text{surr}})$  is the temperature difference between the system and the ambient,  $Q_{\text{dis}}$  is the heat dissipation of the container, which is calculated independently with pure water measured at the same conditions,  $I$  is the laser power density, and  $A_{\lambda}$  is the absorbance of the sample at wavelength of  $\lambda$ .  $hs$  can be calculated using the equation

$$hs = \frac{m_w C_w}{\tau_s}$$

where  $m_w$  is the mass of water (1.0 g),  $C_w$  is the heat capacity of water (4.2 J/g), and  $\tau_s$  is a time constant of the studied system.  $\tau_s$  can be obtained from a plot of the cooling time versus  $-\ln(\theta)$  obtained from the cooling stage, where  $\theta = (T_t - T_{\text{surr}})/(T_{\text{max}} - T_{\text{surr}})$ .

The value of  $Q_{\text{dis}}$  was measured to be 26.6 mW in this study.

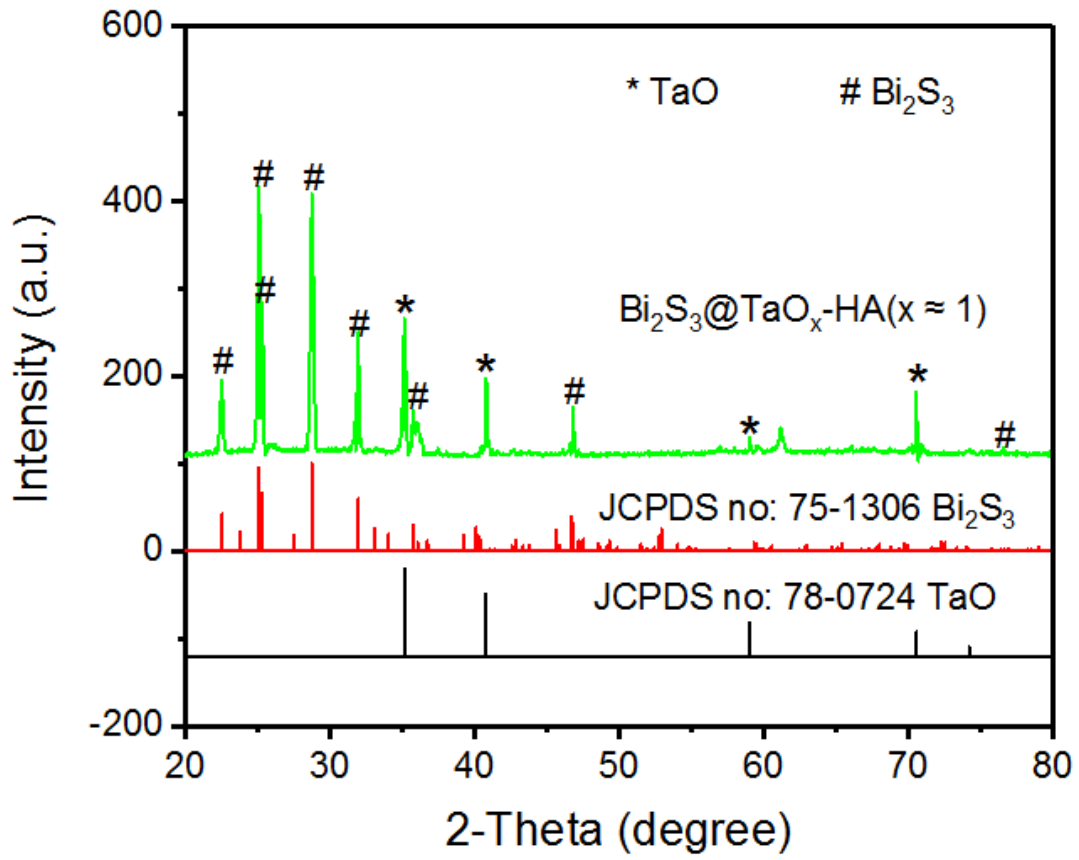

Figure S1. XRD pattern of  $\text{Bi}_2\text{S}_3@\text{TaO}_x\text{-HA}$

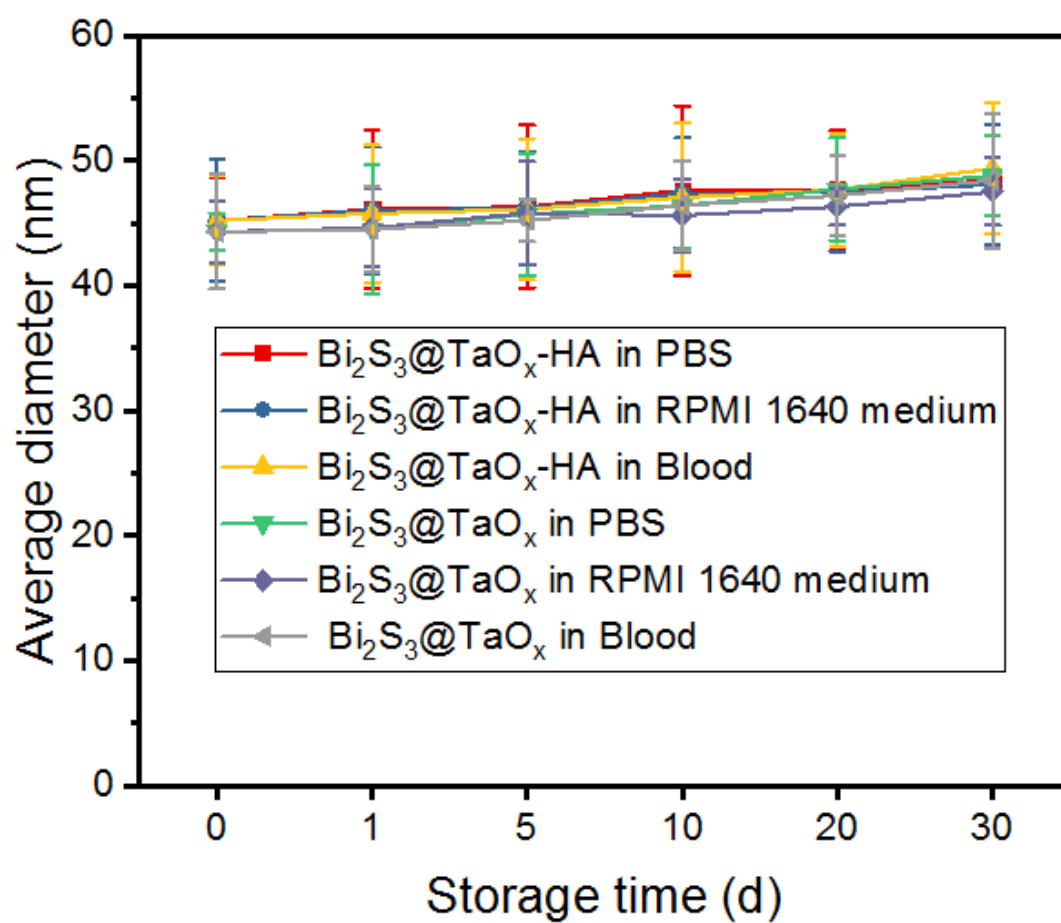

Figure S2. Average diameter of the  $\text{Bi}_2\text{S}_3@ \text{TaO}_x\text{-HA}$  and  $\text{Bi}_2\text{S}_3@ \text{TaO}_x$  nanoparticles that were dissolved in PBS, RPMI 1640 medium and blood.

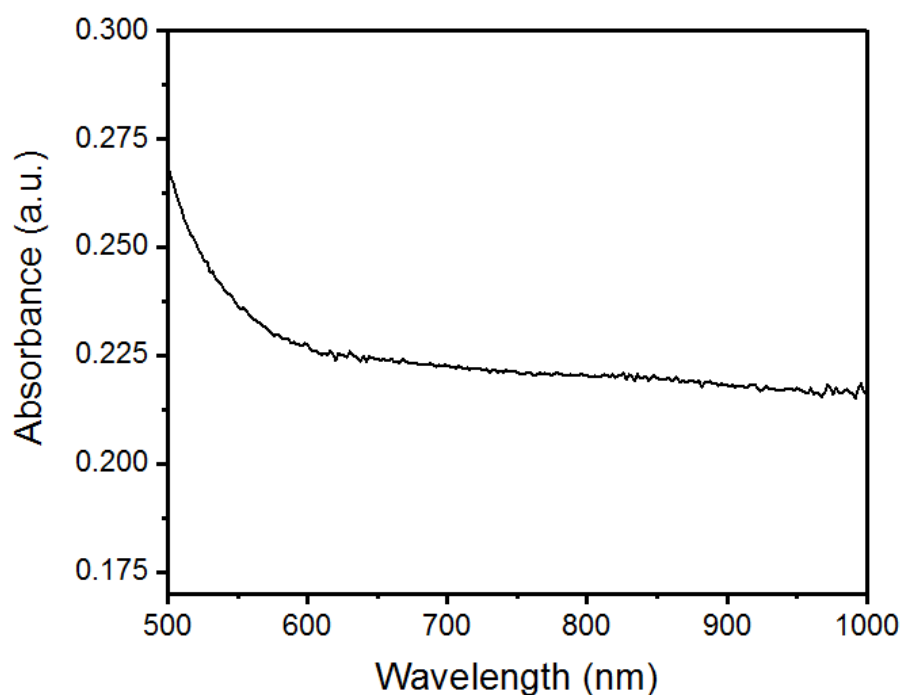

Figure S3. UV-Vis-NIR spectrum of the  $\text{Bi}_2\text{S}_3@\text{TaO}_x\text{-HA}$  nanoparticles

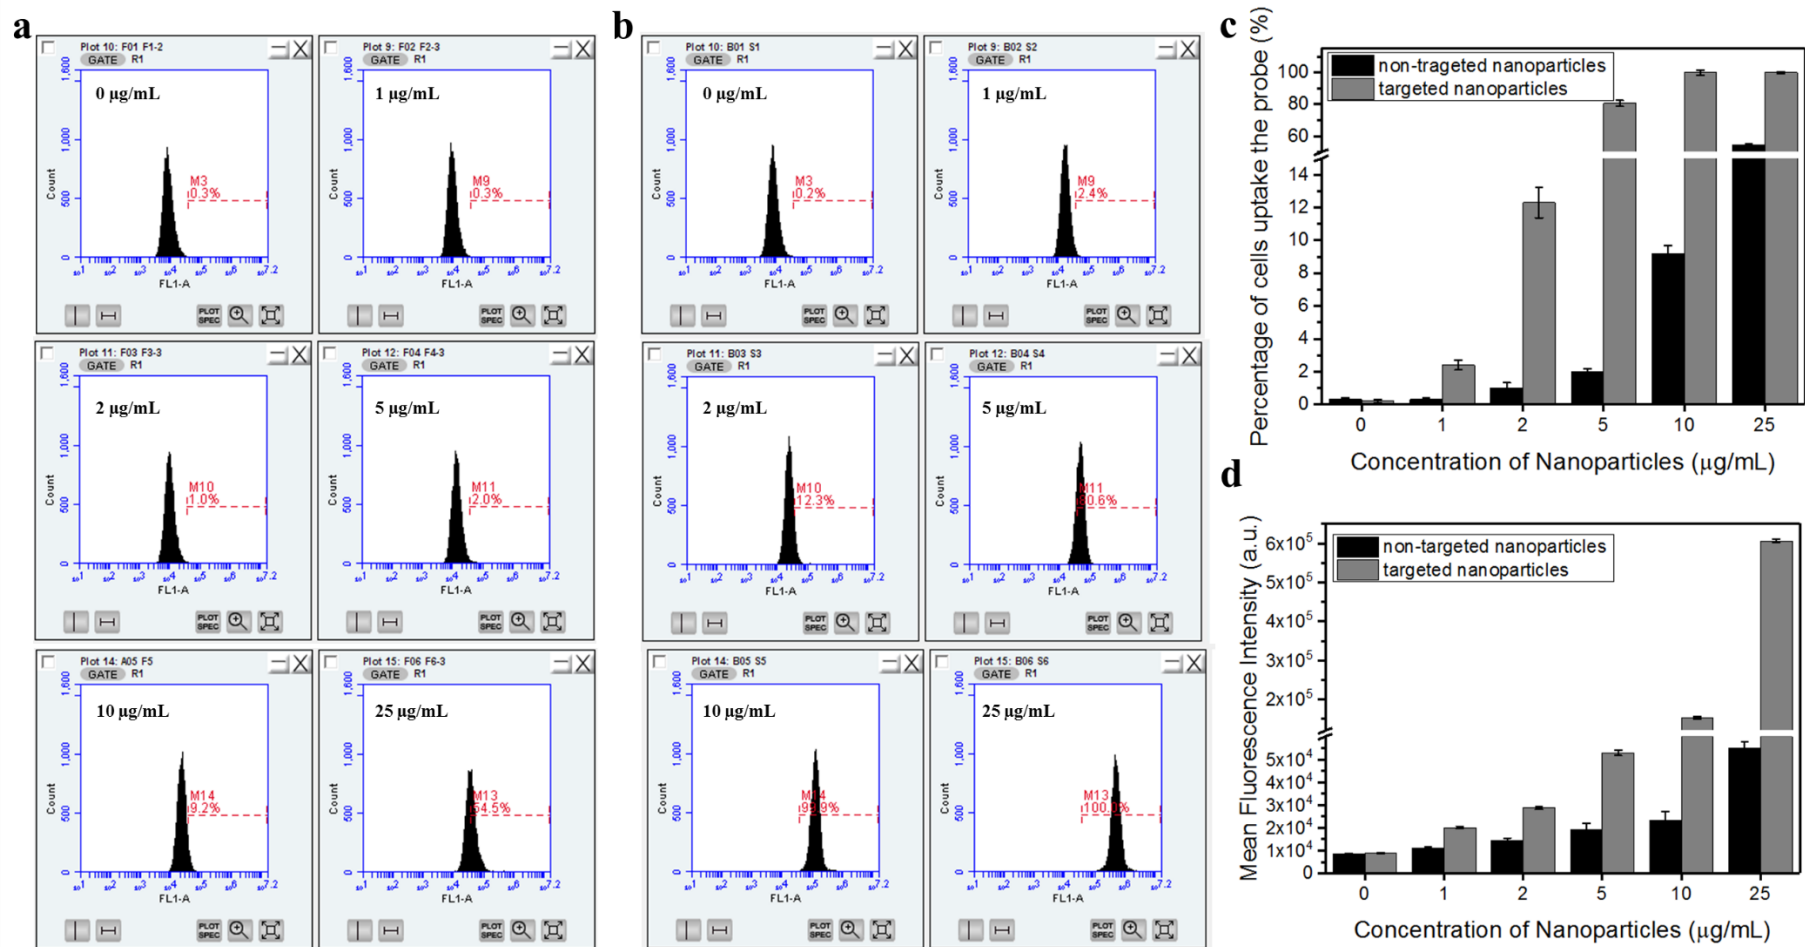

Figure S3. (a-b) Cellular uptake of  $\text{Bi}_2\text{S}_3@\text{TaO}_x$  nanoparticles (a) and  $\text{Bi}_2\text{S}_3@\text{TaO}_x\text{-HA}$  nanoparticles (b) by 4T1 by flow cytometry at 37°C for

4 h; (c) Percentage of cells taking up nanoparticles, (d) Mean fluorescence intensity of the cells
